# Supplementary material
Source: Elsevier journal article supplement (https://www.sciencedirect.com/science/article/pii/S1885585718304419)
Supplement: mmc1 [file S1885585718304419:mmc1.pdf]

## MATERIAL SUPLEMENTARIO

### Tabla del material suplementario

Asociación entre las variables de forma física ( $VO_{2\text{máx}}$  y MET) y las variables de actividad física, sedentarismo y el test de la silla, incluidos los 91 pacientes con datos de acelerometría

|                                                                 | n  | $VO_{2\text{ máx}}$ | p       | MET        | p       |
|-----------------------------------------------------------------|----|---------------------|---------|------------|---------|
| <b>Variables de cuestionarios respondidos por los pacientes</b> |    |                     |         |            |         |
| <i>*AF moderada-vigorosa</i>                                    |    |                     | <0,001  |            | < 0,001 |
| < 150 min/semana                                                | 47 | 18,6 ± 4,6          |         | 9,3 ± 1,9  |         |
| ≥ 150 min/semana                                                | 44 | 22,2 ± 4,2          |         | 11,2 ± 2,3 |         |
| <i>*AF vigorosa</i>                                             |    |                     | <.0,001 |            | <0,001  |
| < 75 min/semana                                                 | 58 | 19,1 ± 4,1          |         | 9,6 ± 2,2  |         |
| ≥ 75 min/semana                                                 | 33 | 22,5 ± 5,1          |         | 11,4 ± 2,0 |         |
| <i>AF tiempo</i>                                                |    |                     | < 0,001 |            | 0,165   |
| < 60 min/día                                                    | 58 | 19,0 ± 4,1          |         | 9,9 ± 2,0  |         |
| ≥ 60 min/día                                                    | 33 | 22,5 ± 5,0          |         | 10,7 ± 2,7 |         |
| <i>Gasto energético total</i>                                   |    |                     | 0,077   |            | 0,036   |
| < 500 MET min/semana                                            | 15 | 18,3 ± 3,4          |         | 9,1 ± 1,9  |         |
| ≥ 500 MET min/semana                                            | 76 | 20,7 ± 4,9          |         | 10,4 ± 2,3 |         |
| <i>*Gasto energético moderado-vigoroso</i>                      |    |                     | <0,001  |            | < 0,001 |
| < 500 MET min/semana                                            | 35 | 18,0 ± 4,3          |         | 9,1 ± 2,0  |         |
| ≥ 500 MET min/semana                                            | 56 | 21,8 ± 4,5          |         | 11,0 ± 2,2 |         |
| <i>RAPA</i>                                                     |    |                     | 0,018   |            | < 0,001 |
| Nivel 1 (poco activo)                                           | 37 | 19,1 ± 4,3          |         | 9,2 ± 2,0  |         |
| Nivel 2 (moderadamente activo)                                  | 25 | 19,8 ± 4,9          |         | 10,2 ± 2,1 |         |
| Nivel 3 (activo)                                                | 29 | 22,3 ± 4,6          |         | 11,4 ± 2,3 |         |
| <i>*RAPA 1 dicotómica</i>                                       |    |                     | 0,006   |            | 0,001   |
| Poco-moderadamente activo                                       | 62 | 19,4 ± 4,5          |         | 9,6 ± 2,1  |         |
| Activo                                                          | 29 | 22,3 ± 4,6          |         | 11,4 ± 2,3 |         |
| <i>Sedestación</i>                                              |    |                     | 0,022   |            | 0,271   |
| < 7 h/día                                                       | 49 | 21,4 ± 4,4          |         | 10,5 ± 2,3 |         |
| ≥ 7 h/día                                                       | 42 | 19,1 ± 4,8          |         | 9,9 ± 2,3  |         |
| <i>Sedentarismo-h/día TV</i>                                    |    |                     | 0,908   |            | 0,925   |
| TV ≤ 2 h/día                                                    | 2  | 21,1 ± 5,1          |         | 10,1 ± 2,2 |         |
| TV 2-4 h/día                                                    | 18 | 20,7 ± 5,5          |         | 10,4 ± 2,5 |         |
| TV ≥ 4 h/día                                                    | 71 | 20,2 ± 4,6          |         | 10,2 ± 2,3 |         |

| <b>Variables obtenidas por métodos objetivos</b>      |    |            |       |            |         |
|-------------------------------------------------------|----|------------|-------|------------|---------|
| <i>Test de la silla</i>                               |    |            | 0,026 |            | 0,002   |
| ≤ 15                                                  | 60 | 19,5 ± 4,5 |       | 9,7 ± 2,2  |         |
| > 15                                                  | 31 | 21,8 ± 4,9 |       | 11,3 ± 2,2 |         |
| <i>Test de la silla + RAPA</i>                        |    |            | 0,017 |            | < 0,001 |
| Poco activo                                           | 40 | 19,2 ± 4,3 |       | 9,2 ± 2,0  |         |
| Moderadamente. activo                                 | 30 | 20,0 ± 5,4 |       | 10,4 ± 2,3 |         |
| Activo                                                | 21 | 22,8 ± 3,9 |       | 11,8 ± 2,1 |         |
| <i>AF moderada-vigorosa</i><br><i>(acelerometría)</i> |    |            | 0,283 |            | 0,312   |
| < 150 min/semana                                      | 63 | 20,0 ± 4,7 |       | 10,1 ± 2,2 |         |
| ≥ 150 min/semana                                      | 28 | 21,1 ± 4,7 |       | 10,6 ± 2,6 |         |
| <i>Sedentarismo (acelerometría)</i>                   |    |            | 0,624 |            | 0,067   |
| < 420 min                                             | 7  | 19,5 ± 5,4 |       | 10,3 ± 2,5 |         |
| ≥ 420 min                                             | 84 | 20,4 ± 4,7 |       | 10,2 ± 2,3 |         |

AF: actividad física; MET: equivalentes metabólicos; TV: televisión; VO<sub>2máx</sub>: consumo máximo de oxígeno.

\*Variables dicotómicas según se cumplan o no las recomendaciones de actividad física de las guías de práctica clínica.
